# Supplementary material
Source: PubMed Central journal article supplement (PMC3425184)
Supplement: supp_pp.112.198119_198119Supplemental_material.pdf [file supp_pp.112.198119_198119Supplemental_material.pdf]

**Supplemental Table S1.** Primer sequences used for genetic and qPCR analyses.

| Target         | Purpose         | Primer ID       | Primer Sequence                     |
|----------------|-----------------|-----------------|-------------------------------------|
| <i>XXT1</i>    | T-DNA Screening | <i>XXT1</i> LP  | GAAATCTCGAGACCGGACTAATAAACCT        |
|                |                 | <i>XXT1</i> RP  | ATCCCCAATAACCGTGCAAGTAATAAC         |
| <i>XXT2</i>    | T-DNA Screening | <i>XXT2</i> LP  | CCAAAGAGCTTTACGCCAAT                |
|                |                 | <i>XXT2</i> RP  | CGCTTGTTAGGTCCGATGAA                |
| <i>XXT5</i>    | T-DNA Screening | <i>XXT5</i> LP  | GATGAGCCTCAGGAAGGTGA                |
|                |                 | <i>XXT5</i> RP  | CATCACGAATTGGCCCTTA                 |
| SAIL T-DNA     | T-DNA Insert    | LB3             | TAGCATCTGAATTTTCATAACCAATCTCGATACAC |
| SALK T-DNA     | T-DNA Insert    | LBb1.3          | ATTTGCCGATTTTCGGAAC                 |
| GABI-kat T-DNA | T-DNA Insert    | GABI LB 8760    | GGGCTACACTGAATTGGTAGCTC             |
| <i>XXT1</i>    | qPCR            | <i>XXT1</i> qLP | GGAGACAATCAGATCCTTCAAATGT           |
|                |                 | <i>XXT1</i> qRP | ATTGCGCGTGGGTTTCAC                  |
| <i>XXT2</i>    | qPCR            | <i>XXT2</i> qLP | CATTTCCACGCACGCAAAC                 |
|                |                 | <i>XXT2</i> qRP | CCGTCACCGGAAGAAGAATC                |
| <i>XXT5</i>    | qPCR            | <i>XXT5</i> qLP | GATGCTTGGGCGCCTATG                  |
|                |                 | <i>XXT5</i> qRP | CAATACCTTCCCGCCTCAT                 |
| <i>PDF2</i>    | qPCR            | <i>PDF2</i> qLP | TAACGTGGCCAAAATGATGC                |
|                |                 | <i>PDF2</i> qRP | GTTCTCCACAACCGCTTGGT                |

## Supplemental Data: Col-0 and Mutant Transcript Characterization

### Supplemental Results and Discussion

Analysis of the *xxt1 xxt2 xxt5* triple mutant cDNA by RT-PCR showed that there was an absence of *XXT1*, *XXT2*, and *XXT5* transcripts when gene-specific primers (GSP) flanking the T-DNA insert were used (Fig. 1D). Although these mutants did not produce wild-type (WT) transcripts, it is possible that they could have produced functional chimeric transcripts (Wang, 2008 and references therein). Therefore, to determine if chimeric transcripts were present we employed RT-PCR with gene-specific primers and the respective left border (LB) or right border (RB) T-DNA border primer combinations (Supplemental Table S1). Results from these experiments showed the presence of chimeric transcripts for all three mutant genes in the *xxt1xxt2xxt5* mutant (Supplemental Fig. S1). The *xxt1* and *xxt5* genes produced chimeric transcripts that have LB border sequences on the 5' and 3' sides of the T-DNA insert (Fig. 1A and 1C). Although, the *xxt2* chimeric transcript has a LB on the 3' side of the T-DNA insert, we could not identify the 5' T-DNA using combinations of gene-specific primers and either of the alternative LB primers suggested. (<http://signal.salk.edu/tdnaprimers.2.html>) or custom designed RB primers (Supplemental Table S1 and Supplemental Fig. S1). PCR amplicons from the chimeric transcripts were sequenced and aligned with the respective gene (Fig. 1C) to determine the precise location of the T-DNA border and the number of stop codons present in all reading frames. With the exception of the 5' side of the *xxt2* T-DNA insertion, the T-DNA insertion introduced multiple stop codons in all three reading frames.

We employed qPCR using primer combinations (Supplemental Table S1) located on the 3' end of each gene to measure transcript levels in the WT (*XXT1*, *XXT2*, and *XXT5* in Col-0) and mutant (*xxt1*, *xxt2*, and *xxt5* in the triple mutant) in the same cDNA samples used for the RT-PCR and sequencing experiments presented above. There were no statistical difference in expression of *XXT1* in Col-0 and the *xxt1* chimera in the *xxt1 xxt2 xxt5* triple mutant. However, there are significant reductions ( $P < 0.01$ ) in the expression of the *xxt2* and *xxt5* chimeras in the *xxt1 xxt2 xxt5* mutant when compared to Col-0 (Supplemental Fig. S2). Thus, the *xxt1xxt2xxt5* mutant is producing chimeric transcripts, with large T-DNA inserts that contain multiple stop codons in each reading frame, which makes the synthesis of functional gene products highly unlikely.

## A. PCR Schematic

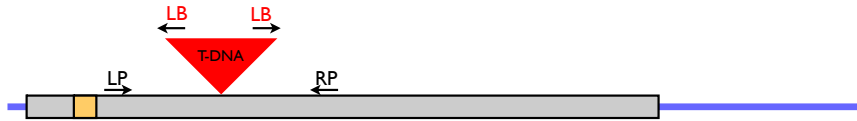

## B. Col-0

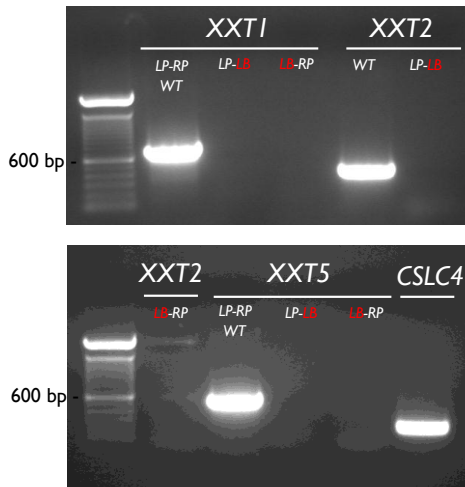

## C. *xxt1 xxt2 xxt5* Mutant

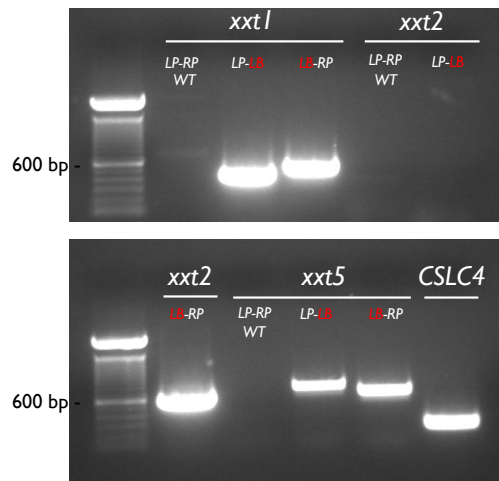

**Supplemental Figure S1.** RT-PCR characterization of xylosyltransferase transcripts in the Col-0 and *xxt1 xxt2 xxt5* mutant. A. Schematic of PCR strategy. Based on results from PCR and sequencing experiments of XXT T-DNA inserts (Figure 1) we characterized Col-0 and mutant transcripts using combinations of GSP left primers (LP), right primers (RP), and T-DNA-specific left border (LB) border primers. Blue line, 5' and 3' UTRs; gray bar, CDS; red triangle, T-DNA insert; orange box, putative transmembrane domain. B. PCR characterization of Col-0 *XXT1*, *XXT2*, and *XXT5* cDNA. *CSLC4*, *Cellulose Synthase-Like Family C4*, a putative xyloglucan glucan synthase (Cocuron et al., 2007). C. PCR characterization of *xxt1 xxt2 xxt5* mutant *XXT* transcripts.

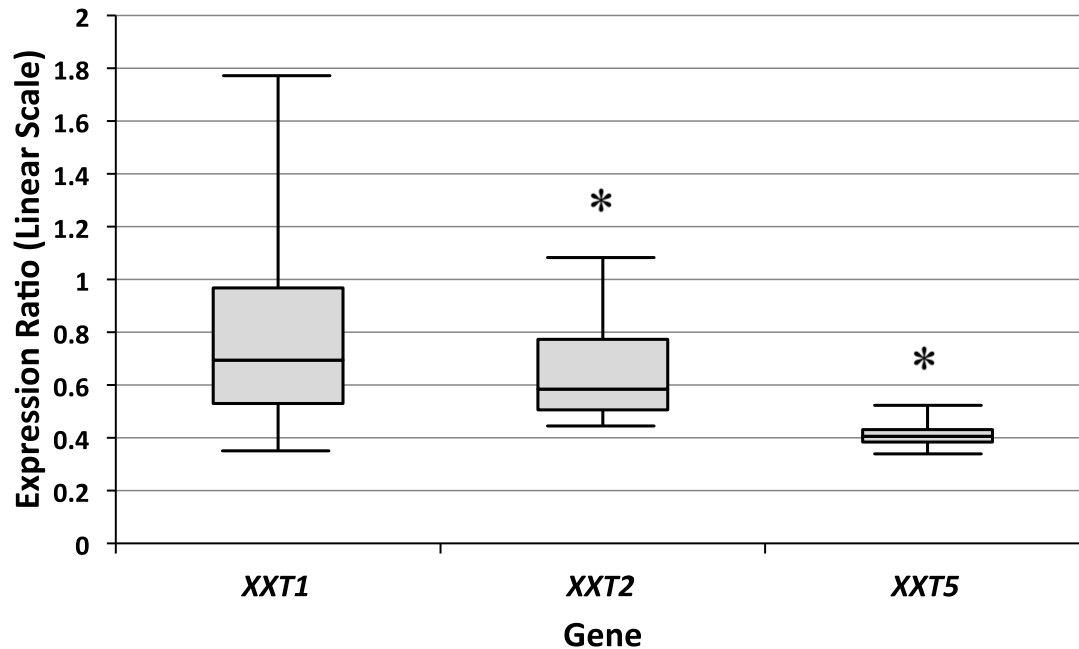

**Supplemental Figure S2.** Relative expression of *XXT1*, *XXT2*, and *XXT5* chimeric transcripts in the *xxt1 xxt2 xxt5* mutant versus Col-0. Transcript levels of *XXT1*, *XXT2*, *XXT5*, and *PROTODERMAL FACTOR 2 (PDF2; At4G04890)* were measured in the *xxt1 xxt2 xxt5* mutant and Col-0 seedlings by qPCR (See Supplemental Material and Methods) of N=3 biological replications. Relative expression software tool (REST) (Pfaffl et al., 2002) was used to calculate the expression ratio of each *XXT* between the *xxt1 xxt2 xxt5* mutant and Col-0 using *PDF2* as the reference gene and 10,000 iterations to calculate statistical significance (\*;  $P < 0.01$ ).

## Supplemental Materials and Methods

Total RNA was isolated from three biological reps of Col-0 and *xxt1xxt2xxt5* seedlings using (RNeasy Plant Mini Kit; Qiagen). RNA samples were digested twice with DNase (DNA-Free kit; Ambion) and converted to cDNA with reverse transcriptase (High Capacity cDNA Reverse Transcription kit; ABI). Isolation of RNA, DNase digestion, and RT reactions were done according to manufacturer's instructions.

For RT-PCR characterization experiments, PCR was performed on cDNA samples using combinations of gene-specific primers and T-DNA-specific primers (Supplemental Table S1) and JumpStart RED Taq ReadyMade PCR mix (Sigma-Aldrich) according to manufacture's instructions. PCR reactions, 50  $\mu$ l total volume, were run at 35 cycles of 94°C for 45 s, 55°C for 1 min, and 72°C for 2 min, and a final extension at 72°C for 5 min. PCR reaction products were

separated on a 1% agarose gel containing 0.005% ethidium bromide. PCR bands were sliced out of the gel and the amplicons were purified using the GeneClean Spin Kit (Q-Biogene) according to manufacture's instructions. PCR amplicons were sequenced by the Michigan State University Research Technology Support Facility using GSP and T-DNA specific primers (Supplemental Table S1) on an ABI 3730 Genetic Analyzer.

For qPCR experiments, we followed the guidelines set forth by of (Udvardi et al., 2008), (Gutierrez et al., 2008), and (Rieu and Powers, 2009) for the analysis of transcript levels in Col-0 and the *xxt1 xxt2 xxt5* mutant. Each 50  $\mu$ l qPCR reaction contained the cDNA equivalent of 100 ng of RNA, 200 nM final concentration of each primer, water, and 25  $\mu$ l Power SYBR Green (ABI). qPCR reactions were analyzed on an ABI 7500 Fast Real-Time PCR System. Lack of genomic DNA contamination was confirmed with PCR using primers that flanked the 2nd intron of *CSLC4* (At3g28180) and by qPCR analysis of RT-minus reactions. Absence of primer dimers was confirmed by examination of dissociation curves. Based on recommendations and protocols detailed in Gutierrez et al. (2008) and Czechowski et al. (2005) *PROTODERMAL FACTOR 2* (*PDF2*; At4G04890) was validated as a reference gene. qPCR  $\Delta$ -Rn values were imported into LinRegPCR software (Ramakers et al., 2003; Ruijter et al., 2009), which was used to calculate the baseline, PCR efficiency, and *Ct* of each PCR reaction. Relative expression software tool (REST) (Pfaffl et al., 2002) was used to determine the relative expression of each transcript with respect to *PDF2* using 10,000 randomizations to calculate statistical significance.

**Supplemental Table S2:** Expanded listing of all individual plant glycan-directed monoclonal antibodies (mAbs) used for glycome profiling (Figure 5). The antibody groupings are based on a hierarchical clustering analysis of all mAbs screened against a panel of plant polysaccharide preparations (Pattathil et al., 2010; 2012) that groups the mAbs according to the polysaccharides that they predominantly recognize. The majority of listings link to the WallMAB DB plant cell wall monoclonal antibody database (<http://www.wallmabdb.net>) that provides detailed descriptions of each mAb, including immunogen, antibody isotype, epitope structure (to the extent known), supplier information, and related literature citations.

**Glycan Group Recognized    mAb Names**

|                                 |                                                                                                                                                                                                  |
|---------------------------------|--------------------------------------------------------------------------------------------------------------------------------------------------------------------------------------------------|
| Non-Fucosylated<br>Xyloglucan-1 | <a href="#">CCRC-M95</a><br><a href="#">CCRC-M101</a>                                                                                                                                            |
| Non-Fucosylated<br>Xyloglucan-2 | <a href="#">CCRC-M104</a><br><a href="#">CCRC-M89</a><br><a href="#">CCRC-M93</a><br><a href="#">CCRC-M87</a><br><a href="#">CCRC-M88</a>                                                        |
| Non-Fucosylated<br>Xyloglucan-3 | <a href="#">CCRC-M100</a><br><a href="#">CCRC-M103</a>                                                                                                                                           |
| Non-Fucosylated<br>Xyloglucan-4 | <a href="#">CCRC-M58</a><br><a href="#">CCRC-M86</a><br><a href="#">CCRC-M55</a><br><a href="#">CCRC-M52</a><br><a href="#">CCRC-M99</a>                                                         |
| Non-Fucosylated<br>Xyloglucan-5 | <a href="#">CCRC-M54</a><br><a href="#">CCRC-M48</a><br><a href="#">CCRC-M49</a><br><a href="#">CCRC-M96</a><br><a href="#">CCRC-M50</a><br><a href="#">CCRC-M51</a><br><a href="#">CCRC-M53</a> |
| Non-Fucosylated<br>Xyloglucan-6 | <a href="#">CCRC-M57</a><br><a href="#">CCRC-M90</a>                                                                                                                                             |
| Fucosylated<br>Xyloglucan       | <a href="#">CCRC-M102</a><br><a href="#">CCRC-M39</a>                                                                                                                                            |

|                                          |                                                                                                                                                                                                                                                                                                |
|------------------------------------------|------------------------------------------------------------------------------------------------------------------------------------------------------------------------------------------------------------------------------------------------------------------------------------------------|
|                                          | <a href="#">CCRC-M106</a><br><a href="#">CCRC-M84</a><br><a href="#">CCRC-M1</a>                                                                                                                                                                                                               |
| Xylan-1/Xyloglucan                       | <a href="#">CCRC-M111</a><br><a href="#">CCRC-M108</a><br><a href="#">CCRC-M109</a>                                                                                                                                                                                                            |
| Xylan-2                                  | <a href="#">CCRC-M119</a><br><a href="#">CCRC-M115</a><br><a href="#">CCRC-M110</a><br><a href="#">CCRC-M105</a><br><a href="#">CCRC-M117</a><br><a href="#">CCRC-M113</a><br><a href="#">CCRC-M120</a><br><a href="#">CCRC-M118</a><br><a href="#">CCRC-M116</a><br><a href="#">CCRC-M114</a> |
| Galactomannan                            | <a href="#">CCRC-M75</a><br><a href="#">CCRC-M70</a><br><a href="#">CCRC-M74</a>                                                                                                                                                                                                               |
| Homogalacturonan<br>Backbone             | <a href="#">CCRC-M38</a><br><a href="#">JIM5</a><br><a href="#">JIM136</a><br><a href="#">JIM7</a><br><a href="#">CCRC-M34</a>                                                                                                                                                                 |
| Rhamnogalacturonan-I<br>Backbone         | <a href="#">CCRC-M69</a><br><a href="#">CCRC-M35</a><br><a href="#">CCRC-M36</a><br><a href="#">CCRC-M14</a><br><a href="#">CCRC-M129</a><br><a href="#">CCRC-M72</a>                                                                                                                          |
| Linseed Mucilage<br>Rhamnogalacturonan-I | <a href="#">CCRC-M40</a><br><a href="#">CCRC-M83</a><br><a href="#">CCRC-M82</a>                                                                                                                                                                                                               |
| Physcomitrella<br>Pectin                 | <a href="#">CCRC-M98</a><br><a href="#">CCRC-M94</a>                                                                                                                                                                                                                                           |

Rhamnogalacturonan-Ia

[CCRC-M5](#)  
[CCRC-M2](#)  
CCRC-M4  
[CCRC-M6](#)

Rhamnogalacturonan-Ib

[CCRC-M23](#)  
[CCRC-M17](#)  
[CCRC-M19](#)  
[CCRC-M18](#)  
[CCRC-M56](#)  
[CCRC-M16](#)

Rhamnogalacturonan-Ic

[JIM137](#)  
[JIM101](#)  
[CCRC-M61](#)  
[CCRC-M30](#)

Rhamnogalacturonan-I  
Arabinogalactan

[CCRC-M60](#)  
[CCRC-M41](#)  
[CCRC-M80](#)  
[CCRC-M79](#)  
[CCRC-M44](#)  
[CCRC-M33](#)  
[CCRC-M32](#)  
[CCRC-M13](#)  
[CCRC-M42](#)  
[CCRC-M24](#)  
[CCRC-M12](#)  
[CCRC-M7](#)  
[CCRC-M77](#)  
[CCRC-M25](#)  
[CCRC-M9](#)  
[CCRC-M128](#)  
[CCRC-M126](#)  
[CCRC-M125](#)  
[CCRC-M123](#)  
[CCRC-M122](#)  
[CCRC-M121](#)  
[CCRC-M112](#)  
[CCRC-M21](#)  
[JIM131](#)  
[CCRC-M22](#)  
[JIM132](#)  
[JIM1](#)



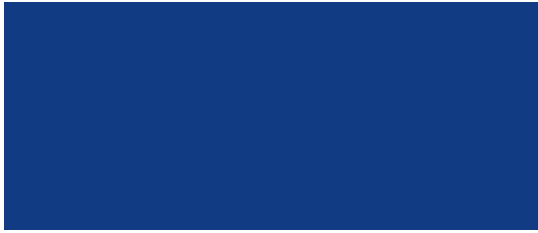

[CCRC-M15](#)  
[CCRC-M8](#)  
[MH4.3E5](#)  
[JIM16](#)  
[CCRC-M10](#)  
[CCRC-M11](#)

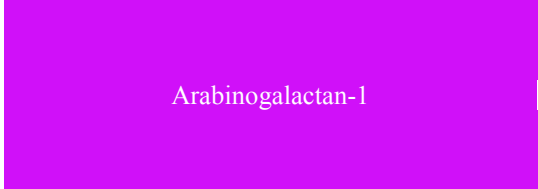

Arabinogalactan-1

[JIM93](#)  
[JIM94](#)  
[JIM11](#)  
[MAC204](#)  
[JIM20](#)

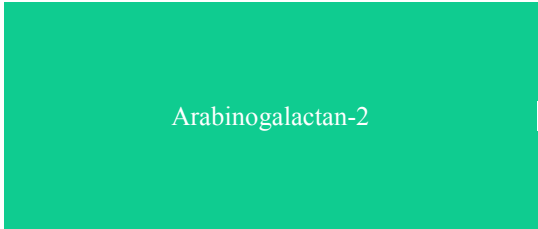

Arabinogalactan-2

[JIM14](#)  
[MAC207](#)  
[JIM19](#)  
[JIM12](#)  
[CCRC-M107](#)

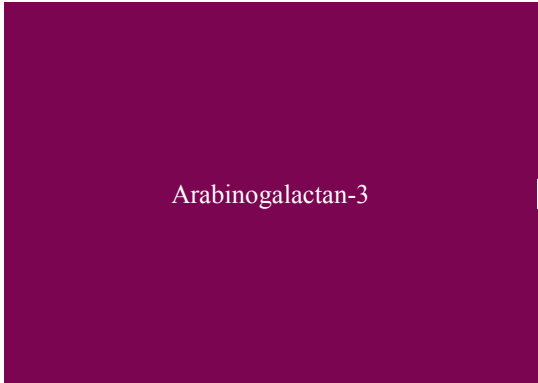

Arabinogalactan-3

[JIM4](#)  
[CCRC-M31](#)  
[JIM17](#)  
[CCRC-M26](#)  
[JIM15](#)  
[JIM8](#)  
[CCRC-M85](#)  
[CCRC-M81](#)  
[MAC266](#)  
[PN16.4B4](#)

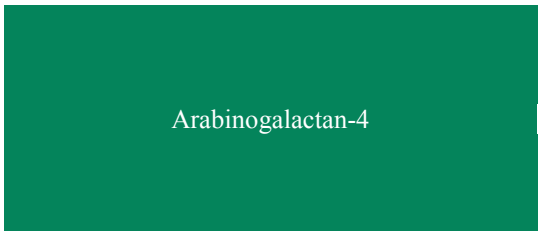

Arabinogalactan-4

[PN16.1B3](#)  
[JIM133](#)  
[JIM13](#)  
[CCRC-M92](#)  
[CCRC-M91](#)  
[CCRC-M78](#)

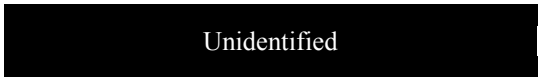

Unidentified

[MAC265](#)  
[CCRC-M97](#)

## References

- Cocuron JC, Lerouxel O, Drakakaki G, Alonso AP, Liepman AH, Keegstra K, Raikhel NV, Wilkerson CG.** (2007). A gene from the cellulose synthase-like c family encodes a  $\beta$ -1, 4 glucan synthase. *Proc. Natl. Acad. Sci.* **104**: 8550-8555
- Gutierrez L, Mauriat M, Pelloux J, Bellini C, Van Wuytswinkel O** (2008). Towards a systematic validation of references in real-time rt-PCR. *Plant Cell* **20**: 1734-1735
- Pattathil S, Avci U, Baldwin D, Swennes AG, McGill JA, Popper Z, Bootten T, Albert A, Davis RH, Chennareddy C, Dong RH, O'Shea B, Rossi R, Leoff C, Freshour G, Narra R, O'Neil M, York WS, Hahn MG.** (2010) A comprehensive toolkit of plant cell wall glycan-directed monoclonal antibodies. *Plant Physiology* **153**: 514-525
- Pattathil S, Avci U, Miller J.S, Hahn MG** (2012) Immunological approaches to plant cell wall and biomass characterization: Glycome Profiling. *In* M. Himmel, ed, *Biomass Conversion: Methods and Protocols*. Humana Press (in press)
- Pfaffl MW, Horgan GW, and Dempfle L.** (2002). Relative expression software tool (REST) for group-wise comparison and statistical analysis of relative expression results in real-time PCR. *Nucleic Acids Res* **30**, e36
- Ramakers C, Ruijter JM, Deprez RH, and Moorman AF.** (2003). Assumption-free analysis of quantitative real-time polymerase chain reaction (PCR) data. *Neurosci Lett* **339**, 62-66.
- Rieu I, and Powers SJ.** (2009). Real-time quantitative RT-PCR: Design, calculations, and statistics. *Plant Cell* **21**, 1031-1033
- Ruijter JM, Ramakers C, Hoogaars WM, Karlen Y, Bakker O, van den Hoff MJ, and Moorman AF.** (2009). Amplification efficiency: Linking baseline and bias in the analysis of quantitative PCR data. *Nucleic Acids Res* **37**, e45
- Schmid, M, Davison, T, Henz, S, Pape, U, Demar, M, Vingron, M, Schölkopf, B, Weigel, D, and Lohmann, J.** (2005). A gene expression map of *Arabidopsis thaliana* development. *Nat. Genet.* **37**: 501-506
- Udvardi MK, Czechowski T, and Scheible WR.** (2008). Eleven golden rules of quantitative RT-PCR. *Plant Cell* **20**, 1736-1737.
- Wang YH.** (2008). How effective is T-DNA insertional mutagenesis in *Arabidopsis*. *J. Biochem. Tech.* **1**, 11-20
